# 1 Fungal communities in sediments along a depth gradient in the Eastern Tropical Pacific

2 Keilor Rojas-Jimenez<sup>1\*</sup>, Hans Peter Grossart<sup>2,3\*</sup>, Erik Cordes<sup>4</sup>, Jorge Cortés<sup>1,5</sup>

3 <sup>1</sup>Escuela de Biología, Universidad de Costa Rica, 11501 San José, Costa Rica.

4 <sup>2</sup>Institute for Biochemistry and Biology, Potsdam University, Maulbeerallee 2, 14469 Potsdam, Germany.

5 <sup>3</sup>Department of Experimental Limnology, Leibniz-Institute of Freshwater Ecology and Inland Fisheries, Alte  
6 Fischerhuetten 2, D-16775 Stechlin, Germany.

7 <sup>4</sup>Department of Biology, Temple University, Philadelphia, Pennsylvania, USA.

8 <sup>5</sup>Centro de Investigación en Ciencias del Mar y Limnología (CIMAR), Universidad de Costa Rica, San Pedro,  
9 11501 San José, Costa Rica.

10

## 11 \*Correspondence:

12 Keilor Rojas-Jimenez, [keilor.rojas@gmail.com](mailto:keilor.rojas@gmail.com)

13 Hans Peter Grossart, [hgrossart@igb-berlin.de](mailto:hgrossart@igb-berlin.de)

14

15 **Keywords:** Deep-sea, aquatic fungi, biodiversity, Metschnikowia, Costa Rica

16

17

## 18 Abstract

19 Deep waters represent the largest biome on Earth and the largest ecosystem of Costa Rica. Fungi  
20 play a fundamental role in global biogeochemical cycling in marine sediments, yet, they remain  
21 little explored. We studied fungal diversity and community composition in several marine  
22 sediments from 16 locations sampled along a bathymetric gradient (from a depth of 380 to 3474  
23 m) in two transects of about 1500 km length in the Eastern Tropical Pacific (ETP) of Costa Rica.  
24 Sequence analysis of the V7-V8 region of the 18S rRNA gene obtained from sediment cores  
25 revealed the presence of 787 fungal amplicon sequence variants (ASVs). On average, we detected  
26 a richness of 75 fungal ASVs per sample. Ascomycota represented the most abundant phylum with  
27 Saccharomycetes constituting the dominant class. Three ASVs accounted for ca. 63% of all fungal  
28 sequences: the yeast *Metschnikowia* (49.4%), *Rhizophydium* (6.9%), and *Cladosporium* (6.7%).  
29 Although we distinguished a cluster dominated by yeasts and a second cluster dominated by  
30 filamentous fungi, we were unable to detect a strong effect of depth, temperature, salinity,  
31 dissolved oxygen, and pH on the composition of fungal communities. We highlight the need to  
32 understand further the ecological role of fungi in deep-sea ecosystems.

33

34

## 35 INTRODUCTION

36 Fungi existed in the oceans long before they conquered land, and within the oceans, the deep sea  
37 represents the largest biome on Earth. Therefore, it is crucial to study fungal diversity and ecology  
38 in deep-sea waters, for which there is a paucity of studies compared to the rest of the ocean.

39 Detailed knowledge of deep-sea fungi is required to understand better the overall fungal  
40 contribution to marine food webs and biogeochemical cycles at the global scale (Manohar and  
41 Raghukumar, 2013; Barone et al., 2018; Drake and Ivarsson, 2018; Grossart et al., 2019; Román et  
42 al., 2019; Hassett et al., 2020).

43 Fungi are active members of deep-sea sediment communities (Pachiadaki et al., 2016; Morales et  
44 al., 2019), but in this ecosystem, they are far more poorly characterized than bacteria and archaea  
45 (Edgcomb et al., 2011; Nagano and Nagahama, 2012; Dekas et al., 2016; Xu et al., 2018). In deep

46 waters, fungi are well adapted to the total absence of light, low temperatures, and high  
47 hydrostatic pressure. Fungal communities have been described in sediments of hydrothermal  
48 vents, methane-cold seeps, oxygen-minimum zones, and associated with other macro-organisms  
49 (Nagahama et al., 2011; Zhang et al., 2016; Batista-García et al., 2017). Furthermore, the  
50 seafloor has been shown to represent a vast ecosystem where micro-aerobic respiration  
51 occurs and where large amounts of microbial life subsist, even hundreds of meters below the  
52 seafloor (D'Hondt, 2002; Roy et al., 2012; D'Hondt et al., 2015; Ivarsson et al., 2016a; Nagano et  
53 al., 2016).

54 Fungi in the deep-sea environment mainly survive on marine snow, which consists of organic  
55 matter derived from photosynthesis that takes place in the photic layer. In addition to performing  
56 aerobic respiration, fungi are capable of carrying out processes such as fermentation, sulfate  
57 reduction, methanogenesis (Lenhart et al., 2012; Orsi et al., 2013; Bochkansky et al., 2017), and  
58 possibly lithoautotrophy (López-García et al., 2003; Nealson et al., 2005; Ivarsson et al., 2016b).  
59 These metabolic processes may be more critical for fungi in deep waters since it has been  
60 observed that as depth increases, fungal populations exhibit a more multitrophic lifestyle (Li et al.,  
61 2019).

62 In recent years, there has been a growing interest in studying fungal communities in deep-sea  
63 environments using culture-dependent and, to an increasing extent, culture-independent  
64 methods. Abundant fungal populations have been observed in a variety of deep-sea locations such  
65 as asphalt seeps in Sao Paulo Plateau (Nagano et al., 2017), methane seeps in the Kuroshima Knoll  
66 (Takishita et al., 2006), hydrothermal vents in the Mid-Atlantic Ridge (Le Calvez et al., 2009; Xu et  
67 al., 2017), sediments of the Peru Trench (Edgcomb et al., 2011), the East Indian Ocean (Zhang et  
68 al., 2014), the High Arctic (Zhang et al., 2015), the Mariana Trench (Xu et al., 2016, 2018), the  
69 Yellow Sea (Li et al., 2016), the Mediterranean Sea (Barone et al., 2018), the Yap Trench (Li et al.,  
70 2019), and subsurface sediments in Suruga-Bay (Nagano et al., 2016).

71 Considering the enormous area to be explored for fungal diversity and function in deep-sea  
72 sediments, the existing studies are minimal and often lack an adequate spatial and temporal  
73 resolution (Grossart and Rojas-Jimenez, 2016; Grossart et al., 2019; Morales et al., 2019).  
74 Therefore, there is still a large number of geographical locations that have not yet been studied,  
75 including the Eastern Tropical Pacific (ETP). The deep-sea waters of the ETP constitute a  
76 particularly important ecosystem in Costa Rica since they represent about 90% of the whole  
77 territory (Cortés, 2016, 2019).

78 The Costa Rican ETP comprises a chain of mountains and submarine volcanoes across the  
79 subduction zone of the Cocos and Caribbean tectonic plates. Here, there is a high diversity of  
80 microhabitats (Lizano, 2001; Protti et al., 2012; Rojas and Alvarado, 2012) including methane  
81 seeps (Sahling et al., 2008; Levin et al., 2012, 2015). Previous studies have shown high endemism  
82 and diversity of macro- and microorganisms in this region (Rusch et al., 2007; Cortés, 2008, 2019;  
83 Rojas-Jiménez, 2018). Also, the Costa Rican ETP is part of a marine corridor that extends through  
84 Isla del Coco to the Galapagos Islands in Ecuador, which represents an essential site for the  
85 conservation and regeneration of marine species throughout the ETP (Cortés, 2012).

86 In this work, we have explored the diversity and composition of fungal communities in deep-sea  
87 sediments of the Costa Rican ETP. Two expeditions were carried out with transects of

88 approximately 1500 km length each, and sediments were sampled at 16 locations at depths  
89 between 380 m and 3474 m. We extracted DNA from subsamples of each sediment core,  
90 sequenced the 18S rRNA gene of eukaryotes, and performed a subsequent bioinformatic analysis.  
91 This work confirms the high abundance and diversity of fungi in sediments of the ETP region. We  
92 expect that our results will support current efforts to conserve this region by providing a baseline  
93 of the high diversity of eukaryotic species and microhabitats found in its deep-sea waters.

94

## 95 MATERIALS AND METHODS

96 We used Illumina sequencing of the eukaryotic 18S rRNA gene to characterize the fungal  
97 community composition in sediments along a depth gradient in the ETP of Costa Rica, across two  
98 transects of ca. 1500 km length each (**Figure 1**). All samples were collected with the permission of  
99 the Ministry of Environment and Energy of Costa Rica (SINAC-CUSBSE-PI-R-032-2018; R-070-2018-  
100 OT-CONAGEBIO). The RV *Atlantis* surveyed the Pacific continental margin of Costa Rica from  
101 October 24<sup>th</sup> to November 5<sup>th</sup>, 2018, from the continental slope to the offshore seamounts across  
102 a subduction zone. In this region, several methane-rich seeps have been detected (Sahling et al.,  
103 2008; Levin et al., 2012, 2015). All sediment cores were collected by the human-occupied vehicle  
104 (HOV) *Alvin* equipped with mechanical, maneuverable arms. We analyzed eight sediment-cores  
105 from this expedition. The following year, the RV *Falkor* surveyed the seamounts extending from  
106 the mainland to the Isla del Coco National Park between January 6<sup>th</sup>-21<sup>st</sup>, 2019. This region  
107 comprises several seamounts and natural gas seeps and provides an important corridor for highly  
108 specialized biological communities occupying the area. The sediment cores were collected  
109 employing the remotely operated vehicle (ROV) *SuBastian*, which is also equipped with  
110 mechanical, maneuverable arms. We analyzed another eight sediment cores from this expedition.  
111 Further details of the sampling sites, dates, and environmental variables measured are shown in  
112 **Table 1**.

113 After collection, nearly one gram of the upper (1-2 cm), middle (6-7 cm), and lower (13-14 cm)  
114 parts of each 15 cm-core was deposited into a 1.5 ml tube, stored at -20 °C on board the vessel  
115 and at -80 °C in the laboratory. The sediment DNA was extracted with a DNA isolation kit  
116 (PowerSoil®, Qiagen) following the manufacturer's instructions. From some subsamples,  
117 unfortunately, it was not possible to obtain enough DNA for subsequent analyzes, so in total, we  
118 retrieved 40 DNA samples (out of the 48 possible) from the 16 cores sampled in both transects.  
119 For the construction of the amplicon library, primers FF390 / FR1 were used to amplify the V7 and  
120 V8 regions of the 18S rRNA gene (Prévost-Bouré et al., 2011). The products were subjected to a  
121 250 nt paired-end sequencing using Illumina MiSeq technology at MrDNA, TX, USA.

122 Sequences were tested for quality and analyzed using version 1.12 of the DADA2 pipeline  
123 (Callahan et al., 2016). The taxonomic assignment was performed on comparing sequences against  
124 the SILVA reference database v132 (Quast et al., 2013), and then curated by comparing sequences  
125 against NCBI. Global singletons were removed. This process resulted in an amplicon sequence  
126 variant table, a higher-resolution analog of the traditional OTU table, which records the number of  
127 times each exact amplicon sequence variant was observed in a sample. Sequence data were  
128 deposited in the sequence-read archive (SRA) under accession PRJNA632873.

129 Statistical analyses and their visualization were performed with the R statistical program (R-Core-  
130 Team 2019) and the Rstudio interface. Package Vegan v2.5-6 (Oksanen et al., 2019) was used to  
131 calculate alpha diversity estimators, non-metric multidimensional scaling analyses (NMDS). Data  
132 tables with the amplicon sequence variants (ASV) abundances were normalized into relative  
133 abundances and then converted into a Bray–Curtis similarity matrix. To determine if there were  
134 significant differences between the fungal community composition according to factors such as  
135 depth or transect, we used the non-parametric multivariate analysis of variance (PERMANOVA)  
136 and pairwise PERMANOVA (adonis2 function with 999 permutations). For the network analysis, we  
137 selected the 24 most abundant eukaryotic ASVs (10 classified as fungi), which corresponded to  
138 nearly 70% of the total number of eukaryotic sequences. We considered a valid co-occurrence  
139 event if the Spearman's correlation coefficient was >0.5 (Junker, 2008). The network inference and  
140 visualization were performed with package igraph v1.2.4.2 using a Fruchterman-Reingold layout  
141 (Csardi and Nepusz, 2006).

142 Environmental data were compiled from the measurements obtained from analyses of the water  
143 samples or sensors nearest to the sediment cores as possible. These data come from a variety of  
144 sources. Temperature and salinity data were obtained from the conductivity-temperature-depth  
145 (CTD) sensors on the HOV *Alvin* and ROV *SuBastian*, which were also equipped with niskin bottles  
146 for water sampling. There was a dissolved oxygen (DO) optode on the ROV *SuBastian* as well as  
147 the autonomous underwater vehicle (AUV) *Sentry* which was deployed over some of the sites  
148 during the 2018 *Atlantis* expedition. Niskin rosettes with attached CTDs were also deployed from  
149 the *Atlantis* and *Falkor* over the sites, and the *Falkor* CTD had a DO optode as well. DO data were  
150 compiled from a combination of these sources. DO data for the samples from the 2018 *Alvin* dives  
151 were derived from either the *Sentry* data (if available from the site) or calculated from a curve  
152 fitted to the DO data obtained from the ROV *SuBastian* and *Falkor* CTD DO-depth profiles. DO data  
153 for the 2019 *SuBastian* push core samples was determined from *SuBastian* optode. The pH data  
154 were exclusively from the water samples obtained by the rosette deployed from the ship or the  
155 niskin bottles on the submersibles. Water samples were brought to room temperature and the  
156 pHT (total scale) was measured using an Orion 5 Star pH meter and glass electrode (ROSS Ultra  
157 pH/ATC Triode 8107BNUMD) in triplicate within 4 h of collection (Dickson et al., 2007).

158

## 159 RESULTS AND DISCUSSION

160 Fungi constituted the most abundant group of eukaryotic organisms in the sediments of the ETP of  
161 Costa Rica, according to the analysis of the sequences of the 18S rRNA gene. We determined the  
162 presence of 787 fungal ASVs out of a total of 2707 eukaryotic ASVs. Fungi represented 59.72% of  
163 the 2,746,436 sequences analyzed (**Figure 2A**). Other abundant eukaryotic groups comprised  
164 Cercozoa and Ichthyosporea, which represented 24,1% and 6,75% of all eukaryotic sequences,  
165 respectively. The genus *Gymnophrys* was the most abundant within Cercozoa, while an ASV  
166 related to *Pirum* was the most abundant within Ichthyosporea. It was not possible to provide a  
167 classification at the taxonomic level of the Kingdom for 2.63% of the sequences, which, however,  
168 contain 24.60% of all observed ASVs. This indicates the presence of a large number of rare species  
169 that have not yet been registered in reference databases, which suggests a high hidden eukaryotic  
170 diversity in the studied deep-sea sediments.

171 The most abundant fungal phylum in marine sediments of the ETP of Costa Rica consisted of  
172 Ascomycota, which represented 43% of all fungal sequences and 71% of the ASVs. The second  
173 most abundant fungal group comprised Basidiomycota, representing nearly 3% of the sequences  
174 but 22% of the ASVs, suggesting a very high phylogenetic diversity within this phylum.  
175 Chytridiomycota represented the third most abundant fungal group, with 3.5% of the sequences  
176 and 2.79% of the ASVs. Other less frequent fungal groups observed in this ecosystem were,  
177 Blastocladiomycota, LKM11, LKM15, Mucoromycota, and Zoopagomycota (**Figure 2B**). These  
178 results are consistent with earlier results obtained in deep-sea sediments from several parts of the  
179 planet confirming the general dominance of Ascomycota in deep-sea sediments together with the  
180 presence of Basidiomycota and Chytridiomycota in lower proportions (Li et al., 2016, 2019; Xu et  
181 al., 2016, 2019; Zhang et al., 2016; Nagano et al., 2017; Barone et al., 2018; Wang et al., 2019).

182 When analyzing the relative abundances at the class level, we detected a total of 32 classes in the  
183 deep-sea sediments, where Saccharomycetes was the most prominent in the majority of the  
184 samples. In samples where Saccharomycetes was dominant, they were typically accompanied by  
185 the presence of Chytridiomycetes. There were also groups of samples with high abundances of  
186 Eurotiomycetes, Dothideomycetes, and Agaricomycetes, but where Saccharomycetes were  
187 practically absent (**Figure 3**).

188 We also observed high variability in the composition within the horizons of some samples. In this  
189 regard, the homogeneity or heterogeneity of horizons could be related to the characteristics of  
190 the sampled habitat, but also with the sedimentation time. It will be necessary to further explore  
191 in more detail the variations that occur at the micro-scale in fungal communities in sediment  
192 profiles, as has been done to study variations in the physicochemical conditions of sediments in  
193 other deep-sea waters (Roy et al., 2012; D'Hondt et al., 2015; Román et al., 2019).

194 The samples of the deep-sea environment studied, characterized by high hydrostatic pressure, low  
195 temperatures, and the absence of light, presented an average richness of 75 fungal ASVs per  
196 sample (range 13-147), while the average value of the Shannon index was 1.77 (range 0.84-2.68).  
197 As with the community analyses, there were no significant differences in the alpha diversity  
198 estimations between depths and expeditions (Kruskal-Wallis,  $P > 0.05$ ). The average value of the  
199 Pielou's evenness was 0.42 (range 0.21-0.71), indicating a certain uniformity in the abundances of  
200 most of the observed phylotypes (**Supplementary Figure 1**).

201 The genus *Metschikowia* was the most abundant within the class Saccharomycetes and also the  
202 most abundant in the majority of the sediments analyzed. The genus *Metschikowia* comprises  
203 single-celled budding yeasts known for its participation in fermentation processes and wine  
204 production, reported mainly in terrestrial environments (Kang et al., 2017; Wang et al., 2017;  
205 Pawlikowska et al., 2019). In this study, we showed that this fungal genus was present in a wide  
206 depth gradient, from 380 to 3474 m, indicating that it can be highly tolerant to gradients in  
207 temperature, dissolved oxygen, food supply, and the hydrostatic pressure associated with this  
208 change in depth. However, in six of the studied sediment cores *Metschikowia* was almost absent,  
209 pointing more to microhabitat variability.

210 The most abundant genus within Chytridiomycetes was *Rhizophidium* which can function as  
211 parasite and decomposer (Letcher et al., 2006; Kagami et al., 2007; Frenken et al., 2017), while the  
212 most abundant genera of Eurotiomycetes and Dothideomycetes were *Aspergillus* and

213 *Cladosporium*, respectively. Within Agaricomycetes, the most abundant phylotype was related to  
214 the genus *Armillaria*. Previous studies have shown that *Aspergillus* and *Penicillium* are common  
215 inhabitants of deep-sea sediments; likewise, the presence of yeasts in this ecosystem has been  
216 frequently detected, but mainly related to genera such as *Pichia*, *Cryptococcus*, *Malassezia*, and  
217 *Rhodotorula* (Takishita et al., 2006; Zhang et al., 2015; Nagano et al., 2016, 2017; Grossart et al.,  
218 2019). To our knowledge, this is the first work showing a high abundance of *Metschikowia* in deep-  
219 sea ecosystems.

220 We used network analysis to explore possible relationships between eukaryotic microorganisms  
221 that coexist in deep marine sediments of Costa Rica (**Figure 4**). This technique allowed us to  
222 visualize positive associations not only between the members of the fungal taxa but also between  
223 fungi and other eukaryotes. For example, we confirmed the strong relationship between  
224 *Metschikowia*, the most abundant ASV from Saccharomycetes, and *Rhizophydium*, the most  
225 abundant ASV from Chytridiomycetes. Interestingly, in this yeast-dominated group, there were  
226 also associations with other eukaryotic ASVs belonging to Cercozoa, Ichthyosporea, Porifera,  
227 Annelida, and Cnidaria (**cluster 1, Figure 4**).

228 In a second group, strong associations were detected between fungal genera such as  
229 *Cladosporium*, *Aspergillus*, *Exophiala*, and *Armillaria*, belonging to the classes Dothideomycetes,  
230 Eurotiomycetes, Chaetothyriomycetes, and Agaricomycetes, respectively. However, in this cluster,  
231 we did not detect associations with other eukaryotic ASVs that could point to co-occurrence with  
232 specific environmental settings (**cluster 2, Figure 4**).

233 The statistical analyzes, at the ASV level, showed no significant differences (Permanova,  $p > 0.05$ ) in  
234 the structure of the communities according to variables depth, salinity, dissolved oxygen, pH, or  
235 between seep/non-seep areas nor between expeditions (**Supplementary Table 1, Supplementary**  
236 **Figure 2**). For example, we showed that depth (and, consequently, hydrostatic pressure) does not  
237 have an apparent effect on the composition of communities, given the wide distribution range of  
238 species. Furthermore, we observe that cluster 1 and cluster 2 inhabit sites whose temperature,  
239 salinity, dissolved oxygen and pH ranges overlap each other (**Table 2**). Therefore, it seems that the  
240 conditions of the deep waters are not limiting for the growth of the fungi and that there could be  
241 other variables influencing the composition of the communities whose effects should be further  
242 explored in future studies.

243 As an empirical observation note, samples that contained a higher proportion of mud were the  
244 ones that exhibited a higher abundance of Saccharomycetes (cluster 1). In contrast, sandy samples  
245 showed higher abundances of Eurotiomycetes and Dothideomycetes, which are filamentous fungi  
246 (cluster 2). This observation suggests a possible relationship between fungal morphology and its  
247 ability to colonize substrates of different textures. For example, yeasts may directly depend on the  
248 type and concentrations of organic matter found in the habitat, but could also perform  
249 fermentation processes in muddy sediments (Takishita et al., 2006; Kutty and Philip, 2008; Zhang  
250 et al., 2015; Taube et al., 2018).

251 We highlight the high prevalence of fungi in deep-sea sediments of the ETP of Costa Rica. The high  
252 abundance of yeasts like *Metschikowia* should be further studied using cultivation-dependent  
253 methods to provide better insights into the physiology, genomic makeup, and their contributions  
254 to global biogeochemical processes. Since it was difficult to distinguish the association of specific

255 environmental variables with variations in the composition of fungal communities, particularly in  
256 the two clusters identified, further research will be necessary to determine how fungal  
257 communities in deep-sea waters are structured as well as to determine their ecological role in the  
258 largest biome on the planet.

259

#### 260 **DATA AVAILABILITY**

261 The dataset generated for this study can be found in NCBI Sequence Read Archive under accession  
262 PRJNA632873.

263

#### 264 **AUTHOR CONTRIBUTIONS**

265 KRJ, HPG, EEC and JC designed the study. JC and EEC collected the samples. KRJ, HPG, EEC and JC  
266 performed the analysis. KRJ wrote the manuscript. All authors helped to revise the manuscript.

267

#### 268 **CONFLICT OF INTEREST**

269 The authors declare that the research was conducted in the absence of any commercial or  
270 financial relationships that could be construed as a potential conflict of interest.

271

#### 272 **ACKNOWLEDGMENTS**

273 We would like to thank all of the officers and crew of the RV *Atlantis* and RV *Falkor* for their  
274 assistance, and the pilots of the HOV *Alvin* and ROV *SuBastian* for their efforts in the collection of  
275 samples. We thank the Ministry of Environment and Energy of Costa Rica for granting the permits  
276 for the collection of samples. Sample processing was carried out with assistance from Odalisca  
277 Breedy and environmental data were compiled by Steve Auscavitch, Jay Lunden, and April  
278 Stabbins at Temple University. We also thank Lisa Levin and Greg Rouse at Scripps Oceanography,  
279 UC San Diego, La Jolla, CA, and Victoria Orphan at the California Institute of Technology, Pasadena,  
280 CA for their support during the development of this project. We acknowledge the support of the  
281 Deutsche Forschungsgemeinschaft and Open Access Publishing Fund of University of Potsdam

282

#### 283 **FUNDING**

284 This project was funded by Universidad de Costa Rica, DFG project GR1540/33-1 given to HPG, and  
285 NSF OCE 1635219 awarded to EEC.

286

287 **REFERENCES**

- 288 Barone, G., Rastelli, E., Corinaldesi, C., Tangherlini, M., Danovaro, R., and Dell'Anno, A. (2018). Benthic deep-  
289 sea fungi in submarine canyons of the Mediterranean Sea. *Prog. Oceanogr.* 168, 57–64.  
290 doi:10.1016/j.pocean.2018.09.011.
- 291 Batista-García, R. A., Sutton, T., Jackson, S. A., Tovar-Herrera, O. E., Balcázar-López, E., Sánchez-Carbente, M.  
292 del R., et al. (2017). Characterization of lignocellulolytic activities from fungi isolated from the deep-  
293 sea sponge *Stelletta normani*. *PLoS One* 12, e0173750. doi:10.1371/journal.pone.0173750.
- 294 Bochdansky, A. B., Clouse, M. A., and Herndl, G. J. (2017). Eukaryotic microbes, principally fungi and  
295 labyrinthulomycetes, dominate biomass on bathypelagic marine snow. *ISME J.* 11, 362–373.  
296 doi:10.1038/ismej.2016.113.
- 297 Callahan, B. J., McMurdie, P. J., Rosen, M. J., Han, A. W., Johnson, A. J. A., and Holmes, S. P. (2016). DADA2:  
298 High-resolution sample inference from Illumina amplicon data. *Nat. Methods* 13, 581–583.  
299 doi:10.1038/nmeth.3869.
- 300 Cortés, J. (2008). Historia de la investigación marina de la Isla del Coco, Costa Rica. *Rev. Biol. Trop.* (Suppl. 2),  
301 1–18. doi:10.15517/RBT.V56I2.26934.
- 302 Cortés, J. (2012). Marine biodiversity of an Eastern Tropical Pacific oceanic island, Isla del Coco, Costa Rica.  
303 *Rev. Biol. Trop.* 60, 131–185.
- 304 Cortés, J. (2016). The Pacific coastal and marine ecosystems. *Costa Rican Ecosyst. Univ. Chicago Press.*  
305 *Chicago London*, 97–138.
- 306 Cortés, J. (2019). “Isla del Coco, Costa Rica, Eastern Tropical Pacific,” in *Mesophotic Coral Ecosystems*  
307 (Springer), 465–475. doi:10.1007/978-3-319-92735-0\_26.
- 308 Csardi, G., and Nepusz, T. (2006). The igraph software package for complex network research. *InterJournal,*  
309 *Complex Syst.* 1695, 1–9.
- 310 D’Hondt, S. (2002). Metabolic activity of subsurface life in deep-sea sediments. *Science (80- )*. 295, 2067–  
311 2070. doi:10.1126/science.1064878.
- 312 D’Hondt, S., Inagaki, F., Zarikian, C. A., Abrams, L. J., Dubois, N., Engelhardt, T., et al. (2015). Presence of  
313 oxygen and aerobic communities from sea floor to basement in deep-sea sediments. *Nat. Geosci.* 8,  
314 299–304. doi:10.1038/ngeo2387.
- 315 Dekas, A. E., Connon, S. A., Chadwick, G. L., Trembath-Reichert, E., and Orphan, V. J. (2016). Activity and  
316 interactions of methane seep microorganisms assessed by parallel transcription and FISH-NanoSIMS  
317 analyses. *ISME J.* 10, 678–692. doi:10.1038/ismej.2015.145.
- 318 Dickson, A. G., Sabine, C. L., and Christian, J. R. (2007). *Guide to best practices for ocean CO2 measurements.*  
319 North Pacific Marine Science Organization Available at:  
320 [https://www.nodc.noaa.gov/ocads/oceans/Handbook\\_2007.html](https://www.nodc.noaa.gov/ocads/oceans/Handbook_2007.html).
- 321 Drake, H., and Ivarsson, M. (2018). The role of anaerobic fungi in fundamental biogeochemical cycles in the  
322 deep biosphere. *Fungal Biol. Rev.* 32, 20–25. doi:10.1016/j.fbr.2017.10.001.
- 323 Edgcomb, V. P., Beaudoin, D., Gast, R., Biddle, J. F., and Teske, A. (2011). Marine subsurface eukaryotes: the  
324 fungal majority. *Environ. Microbiol.* 13, 172–183. doi:10.1111/j.1462-2920.2010.02318.x.
- 325 Frenken, T., Alacid, E., Berger, S. A., Bourne, E. C., Gerphagnon, M., Grossart, H. P., et al. (2017). Integrating  
326 chytrid fungal parasites into plankton ecology: research gaps and needs. *Environ. Microbiol.* 19, 3802–  
327 3822. doi:10.1111/1462-2920.13827.



- 328 Grossart, H.-P. H.-P. P., and Rojas-Jimenez, K. (2016). Aquatic fungi: targeting the forgotten in microbial  
329 ecology. *Curr Opin Microbiol* 31, 140–145. doi:10.1016/j.mib.2016.03.016.
- 330 Grossart, H.-P., Van den Wyngaert, S., Kagami, M., Wurzbacher, C., Cunliffe, M., and Rojas-Jimenez, K.  
331 (2019). Fungi in aquatic ecosystems. *Nat. Rev. Microbiol.* 17, 339–354. doi:10.1038/s41579-019-0175-  
332 8.
- 333 Hassett, B. T., Vonnahme, T. R., Peng, X., Jones, E. B. G., and Heuzé, C. (2020). Global diversity and  
334 geography of planktonic marine fungi. *Bot. Mar.* 63, 121–139.
- 335 Ivarsson, M., Bengtson, S., and Neubeck, A. (2016a). The igneous oceanic crust – Earth’s largest fungal  
336 habitat? *Fungal Ecol.* 20, 249–255. doi:10.1016/j.funeco.2016.01.009.
- 337 Ivarsson, M., Schnürer, A., Bengtson, S., and Neubeck, A. (2016b). Anaerobic Fungi: A Potential Source of  
338 Biological H<sub>2</sub> in the Oceanic Crust. *Front. Microbiol.* 7, 674. doi:10.3389/fmicb.2016.00674.
- 339 Junker, B. H. (2008). Networks in Biology. *Anal. Biol. Networks*, 1–14. doi:doi:10.1002/9780470253489.ch1.
- 340 Kagami, M., de Bruin, A., Ibelings, B. W., and Van Donk, E. (2007). Parasitic chytrids: their effects on  
341 phytoplankton communities and food-web dynamics. *Hydrobiologia* 578, 113–129.
- 342 Kang, Y. M., Choi, J. E., Komakech, R., Park, J. H., Kim, D. W., Cho, K. M., et al. (2017). Characterization of a  
343 novel yeast species *Metschnikowia persimmonesis* KCTC 12991BP (KIOM G15050 type strain) isolated  
344 from a medicinal plant, Korean persimmon calyx (*Diospyros kaki* Thumb). *AMB Express* 7, 199.  
345 doi:10.1186/s13568-017-0503-1.
- 346 Kutty, S. N., and Philip, R. (2008). Marine yeasts—a review. *Yeast* 25, 465–483. doi:10.1002/yea.1599.
- 347 Le Calvez, T., Burgaud, G., Mahé, S., Barbier, G., Vandenkoornhuyse, P., Mahe, S., et al. (2009). Fungal  
348 diversity in deep-sea hydrothermal ecosystems. *Appl. Environ. Microbiol.* 75, 6415–6421.  
349 doi:10.1128/AEM.00653-09.
- 350 Lenhart, K., Bunge, M., Ratering, S., Neu, T. R., Schüttmann, I., Greule, M., et al. (2012). Evidence for  
351 methane production by saprotrophic fungi. *Nat. Commun.* 3, 1046. doi:10.1038/ncomms2049.
- 352 Letcher, P. M., Powell, M. J., Churchill, P. F., and Chambers, J. G. (2006). Ultrastructural and molecular  
353 phylogenetic delineation of a new order, the Rhizophydiales (Chytridiomycota). *Mycol. Res.* 110, 898–  
354 915. doi:https://doi.org/10.1016/j.mycres.2006.06.011.
- 355 Levin, L. A., Mendoza, G. F., Grupe, B. M., Gonzalez, J. P., Jellison, B., Rouse, G., et al. (2015). Correction:  
356 Biodiversity on the Rocks: Macrofauna Inhabiting Authigenic Carbonate at Costa Rica Methane Seeps.  
357 *PLoS One* 10, e0136129. doi:10.1371/journal.pone.0136129.
- 358 Levin, L. A., Orphan, V. J., Rouse, G. W., Rathburn, A. E., Ussler, W., Cook, G. S., et al. (2012). A hydrothermal  
359 seep on the Costa Rica margin: middle ground in a continuum of reducing ecosystems. *Proc. R. Soc. B*  
360 *Biol. Sci.* 279, 2580–2588. doi:10.1098/rspb.2012.0205.
- 361 Li, W., Wang, M., Burgaud, G., Yu, H., and Cai, L. (2019). Fungal community composition and potential depth-  
362 related driving factors impacting distribution pattern and trophic modes from epi- to abyssopelagic  
363 zones of the Western Pacific Ocean. *Microb. Ecol.* 78, 820–831. doi:10.1007/s00248-019-01374-y.
- 364 Li, W., Wang, M. M., Wang, X. G., Cheng, X. L., Guo, J. J., Bian, X. M., et al. (2016). Fungal communities in  
365 sediments of subtropical Chinese seas as estimated by DNA metabarcoding. *Sci. Rep.* 6, 26528.  
366 doi:10.1038/srep26528.
- 367 Lizano, O. (2001). Batimetria de la plataforma insular alrededor de las Isla del Coco, Costa Rica. *Rev. Biol.*  
368 *Trop.* 49 (Suppl., 163–170.
- 369 López-García, P., Philippe, H., Gail, F., and Moreira, D. (2003). Autochthonous eukaryotic diversity in

- 370 hydrothermal sediment and experimental microcolonizers at the Mid-Atlantic Ridge. *Proc. Natl. Acad.*  
371 *Sci.* 100, 697–702.
- 372 Manohar, C. S., and Raghukumar, C. (2013). Fungal diversity from various marine habitats deduced through  
373 culture-independent studies. *FEMS Microbiol. Lett.* 341, 69–78. doi:10.1111/1574-6968.12087.
- 374 Morales, S. E., Biswas, A., Herndl, G. J., and Baltar, F. (2019). Global Structuring of Phylogenetic and  
375 Functional Diversity of Pelagic Fungi by Depth and Temperature. *Front. Mar. Sci.* 6, 131.  
376 doi:10.3389/fmars.2019.00131.
- 377 Nagahama, T., Takahashi, E., Nagano, Y., Abdel-Wahab, M. A., and Miyazaki, M. (2011). Molecular evidence  
378 that deep-branching fungi are major fungal components in deep-sea methane cold-seep sediments.  
379 *Environ. Microbiol.* 13, 2359–2370. doi:10.1111/j.1462-2920.2011.02507.x.
- 380 Nagano, Y., Konishi, M., Nagahama, T., Kubota, T., Abe, F., and Hatada, Y. (2016). Retrieval of deeply buried  
381 culturable fungi in marine subsurface sediments, Suruga-Bay, Japan. *Fungal Ecol.* 20, 256–259.
- 382 Nagano, Y., Miura, T., Nishi, S., Lima, A. O., Nakayama, C., Pellizari, V. H., et al. (2017). Fungal diversity in  
383 deep-sea sediments associated with asphalt seeps at the Sao Paulo Plateau. *Deep Sea Res. Part II Top.*  
384 *Stud. Oceanogr.* 146, 59–67.
- 385 Nagano, Y., and Nagahama, T. (2012). Fungal diversity in deep-sea extreme environments. *Fungal Ecol.* 5,  
386 463–471. doi:10.1016/j.funeco.2012.01.004.
- 387 Nealson, K. H., Inagaki, F., and Takai, K. (2005). Hydrogen-driven subsurface lithoautotrophic microbial  
388 ecosystems (SLiMEs): do they exist and why should we care? *Trends Microbiol.* 13, 405–410.
- 389 Oksanen, J., Blanchet, F. G., Friendly, M., Kindt, R., Legendre, P., McGlinn, D., et al. (2019). vegan:  
390 Community Ecology Package (R package version 2.5–6).
- 391 Orsi, W., Biddle, J. F., and Edgcomb, V. (2013). Deep sequencing of subseafloor eukaryotic rRNA reveals  
392 active fungi across marine subsurface provinces. *PLoS One* 8, e56335.  
393 doi:10.1371/journal.pone.0056335.
- 394 Pachiadaki, M. G., Rédou, V., Beaudoin, D. J., Burgaud, G., and Edgcomb, V. P. (2016). Fungal and prokaryotic  
395 activities in the marine subsurface biosphere at Peru margin and Canterbury Basin inferred from RNA-  
396 based analyses and microscopy. *Front. Microbiol.* 7, 846. doi:10.3389/fmicb.2016.00846.
- 397 Pawlikowska, E., James, S. A., Breierova, E., Antolak, H., and Kregiel, D. (2019). Biocontrol capability of local  
398 *Metschnikowia* sp. isolates. *Antonie Van Leeuwenhoek* 112, 1425–1445. doi:10.1007/s10482-019-  
399 01272-w.
- 400 Prévost-Bouré, N., Christen, R., Dequiedt, S., Mougél, C., Lelièvre, M., Jolivet, C., et al. (2011). Validation and  
401 Application of a PCR Primer Set to Quantify Fungal Communities in the Soil Environment by Real-Time  
402 Quantitative PCR. *PLoS One* 6, e24166. doi:10.1371/journal.pone.0024166.
- 403 Protti, M., González, V., Freymueller, J., and Doelger, S. (2012). Isla del Coco, on Cocos Plate, converges with  
404 Isla de San Andrés, on the Caribbean Plate, at 78mm/yr. *Rev. Biol. Trop.* 60, 33–41.
- 405 Quast, C., Pruesse, E., Yilmaz, P., Gerken, J., Schweer, T., Yarza, P., et al. (2013). The SILVA ribosomal RNA  
406 gene database project: improved data processing and web-based tools. *Nucleic Acids Res.* 41, D590–  
407 D596. doi:10.1093/nar/gks1219.
- 408 Rojas-Jiménez, K. (2018). Microorganismos del corredor marino Isla del Coco-Galápagos: diversidad  
409 funcional y de especies. *Rev. Tecnol. en Marcha.* doi:10.18845/tm.v31i4.3974.
- 410 Rojas, W., and Alvarado, G. E. (2012). Marco geológico y tectónico de la Isla del Coco y la región marítima  
411 circunvecina, Costa Rica zone off the central Pacific coast of Costa Rica. *Rev. Biol. Trop.* 60, 15–32.

- 412 Román, S., Ortiz-Álvarez, R., Romano, C., Casamayor, E. O., and Martin, D. (2019). Microbial Community  
413 Structure and Functionality in the Deep Sea Floor: Evaluating the Causes of Spatial Heterogeneity in a  
414 Submarine Canyon System (NW Mediterranean, Spain). *Front. Mar. Sci.* 6.  
415 doi:10.3389/fmars.2019.00108.
- 416 Roy, H., Kallmeyer, J., Adhikari, R. R., Pockalny, R., Jorgensen, B. B., and D'Hondt, S. (2012). Aerobic Microbial  
417 Respiration in 86-Million-Year-Old Deep-Sea Red Clay. *Science (80-. )*. 336, 922–925.  
418 doi:10.1126/science.1219424.
- 419 Rusch, D. B., Halpern, A. L., Sutton, G., Heidelberg, K. B., Williamson, S., Yooseph, S., et al. (2007). The  
420 Sorcerer II Global Ocean Sampling Expedition: Northwest Atlantic through Eastern Tropical Pacific.  
421 *PLoS Biol.* 5, e77. doi:10.1371/journal.pbio.0050077.
- 422 Sahling, H., Masson, D. G., Ranero, C. R., Hühnerbach, V., Weinrebe, W., Klauke, I., et al. (2008). Fluid  
423 seepage at the continental margin offshore Costa Rica and southern Nicaragua. *Geochemistry,  
424 Geophys. Geosystems* 9, n/a-n/a. doi:10.1029/2008GC001978.
- 425 Takishita, K., Tsuchiya, M., Reimer, J. D., and Maruyama, T. (2006). Molecular evidence demonstrating the  
426 basidiomycetous fungus *Cryptococcus curvatus* is the dominant microbial eukaryote in sediment at the  
427 Kuroshima Knoll methane seep. *Extremophiles* 10, 165–169. doi:10.1007/s00792-005-0495-7.
- 428 Taube, R., Ganzert, L., Grossart, H.-P., Gleixner, G., and Premke, K. (2018). Organic matter quality structures  
429 benthic fatty acid patterns and the abundance of fungi and bacteria in temperate lakes. *Sci. Total  
430 Environ.* 610–611, 469–481. doi:https://doi.org/10.1016/j.scitotenv.2017.07.256.
- 431 Wang, C., Liu, Y., Zhang, T., Lu, C., Liu, Y., Zhang, D., et al. (2017). *Metschnikowia persici* sp. nov., a novel  
432 protease-producing yeast species from China. *Curr. Microbiol.* 74, 365–370.
- 433 Wang, Z.-P., Liu, Z.-Z., Wang, Y.-L., Bi, W.-H., Liu, L., Wang, H.-Y., et al. (2019). Fungal community analysis in  
434 seawater of the Mariana Trench as estimated by Illumina HiSeq. *RSC Adv.* 9, 6956–6964.  
435 doi:10.1039/C8RA10142F.
- 436 Xu, W., Gao, Y., Gong, L., Li, M., Pang, K.-L., and Luo, Z.-H. (2019). Fungal diversity in the deep-sea hadal  
437 sediments of the Yap Trench by cultivation and high throughput sequencing methods based on ITS  
438 rRNA gene. *Deep Sea Res. Part I Oceanogr. Res. Pap.* 145, 125–136. doi:10.1016/j.dsr.2019.02.001.
- 439 Xu, W., Guo, S., Pang, K.-L., and Luo, Z.-H. (2017). Fungi associated with chimney and sulfide samples from a  
440 South Mid-Atlantic Ridge hydrothermal site: distribution, diversity and abundance. *Deep Sea Res. Part  
441 I Oceanogr. Res. Pap.* 123, 48–55.
- 442 Xu, W., Luo, Z.-H., Guo, S., and Pang, K.-L. (2016). Fungal community analysis in the deep-sea sediments of  
443 the Pacific Ocean assessed by comparison of ITS, 18S and 28S ribosomal DNA regions. *Deep Sea Res.  
444 Part I Oceanogr. Res. Pap.* 109, 51–60. doi:10.1016/j.dsr.2016.01.001.
- 445 Xu, Z., Wang, M., Wu, W., Li, Y., Liu, Q., Han, Y., et al. (2018). Vertical Distribution of Microbial Eukaryotes  
446 From Surface to the Hadal Zone of the Mariana Trench. *Front. Microbiol.* 9.  
447 doi:10.3389/fmicb.2018.02023.
- 448 Zhang, T., Fei Wang, N., Qin Zhang, Y., Yu Liu, H., and Yan Yu, L. (2015). Diversity and distribution of fungal  
449 communities in the marine sediments of Kongsfjorden, Svalbard (High Arctic). *Sci. Rep.* 5, 14524.  
450 doi:10.1038/srep14524.
- 451 Zhang, X.-Y., Wang, G.-H., Xu, X.-Y., Nong, X.-H., Wang, J., Amin, M., et al. (2016). Exploring fungal diversity in  
452 deep-sea sediments from Okinawa Trough using high-throughput Illumina sequencing. *Deep Sea Res.  
453 Part I Oceanogr. Res. Pap.* 116, 99–105. doi:10.1016/j.dsr.2016.08.004.
- 454 Zhang, X., Tang, G., Xu, X., Nong, X., and Qi, S.-H. (2014). Insights into Deep-Sea Sediment Fungal  
455 Communities from the East Indian Ocean Using Targeted Environmental Sequencing Combined with

456 Traditional Cultivation. *PLoS One* 9, e109118. doi:10.1371/journal.pone.0109118.

457

458 **Table 1.** Sites of the Eastern Tropical Pacific of Costa Rica sampled in this study, with the  
 459 respective values of the environmental variables measured.

460

| Sample | RV       | Site            | Date     | Depth [m] | Temp [°C] | Salinity [PSU] | DO [mg/L] | pH   | Data sources* |
|--------|----------|-----------------|----------|-----------|-----------|----------------|-----------|------|---------------|
| A1     | Atlantis | Mound 12**      | 24/10/18 | 996       | 5,06      | 34,57          | 1,10      | 7,62 | 1, 6          |
| A2     | Atlantis | Quepos Slide**  | 25/10/18 | 380       | 11,75     | 34,76          | 0,20      | 7,71 | 1, 7          |
| A3     | Atlantis | Quepos Plateau  | 26/10/18 | 2200      | 2,06      | 34,60          | 3,73      | 8,06 | 2, 4, 6       |
| A4     | Atlantis | Seamount 3      | 28/10/18 | 1383      | 3,35      | 34,60          | 1,67      | 7,70 | 2, 4, 6       |
| A5     | Atlantis | Mound 11**      | 3/11/18  | 1024      | 4,83      | 34,57          | 1,24      | 7,67 | 6, 7          |
| A6     | Atlantis | Jaco Scar**     | 4/11/18  | 1788      | 2,54      | 34,63          | 2,42      | 7,61 | 1, 6          |
| A7     | Atlantis | Parrita Seep**  | 5/11/18  | 1410      | 3,41      | 34,60          | 2,21      | 7,71 | 6,00          |
| A8     | Atlantis | Quepos Plateau  | 26/10/18 | 1873      | 3,50      | 34,61          | 3,11      | 8,06 | 1, 3          |
| F1     | Falkor   | The Thumb**     | 10/1/19  | 1072      | 4,54      | 34,58          | 1,22      | 7,69 | 4, 7          |
| F2     | Falkor   | Parrita Scar    | 11/1/19  | 1419      | 3,35      | 34,61          | 2,08      | 7,67 | 4, 5          |
| F3     | Falkor   | Rio Bongo       | 13/1/19  | 659       | 14,41     | 34,93          | 1,50      | 7,60 | 4, 7          |
| F4     | Falkor   | Subduction Seep | 14/1/19  | 3474      | 1,88      | 34,66          | 4,20      | 7,71 | 4, 5          |
| F5     | Falkor   | Seamount 5.5    | 15/1/19  | 1540      | 3,00      | 34,62          | 2,64      | 7,70 | 4, 5          |
| F6     | Falkor   | Seamount 7      | 16/1/19  | 1320      | 4,11      | 34,59          | 1,80      | 7,67 | 4, 5          |
| F7     | Falkor   | Coco Canyon     | 18/1/19  | 950       | 5,02      | 34,57          | 1,40      | 8,12 | 4, 5          |
| F8     | Falkor   | Mound Jaguar**  | 25/1/19  | 1903      | 2,43      | 34,63          | 3,13      | 7,75 | 4, 5          |

461 \* 1. AUV Sentry sensors, 2. HOV Alvin sensors, 3. HOV Alvin Niskin bottle, 4. ROV SuBastian sensors, 5.  
 462 ROV SuBastian Niskin bottle, 6. RV Atlantis CTD, 7. RV Falkor CTD

463 \*\* Seep areas

464 **Table 2.** Range of values of the environmental variables for each of the fungal clusters identified

| <b>Variable</b>                | <b>Cluster 1<br/>(yeast dominated)</b> | <b>Cluster 2 (Filamentous<br/>forms)</b> |
|--------------------------------|----------------------------------------|------------------------------------------|
| <b>Depth [m]</b>               | 380-1788                               | 659-3474                                 |
| <b>Temperature [°C]</b>        | 1.88-14.41                             | 2.54-11.75                               |
| <b>Salinity [PSU]</b>          | 34.57-34.93                            | 34.59-34.76                              |
| <b>Dissolved Oxygen [mg/L]</b> | 1.10-4.20                              | 0.2-2.64                                 |
| <b>pH</b>                      | 7.60-8.06                              | 7.61-7.70                                |

465

466 **Figure 1**

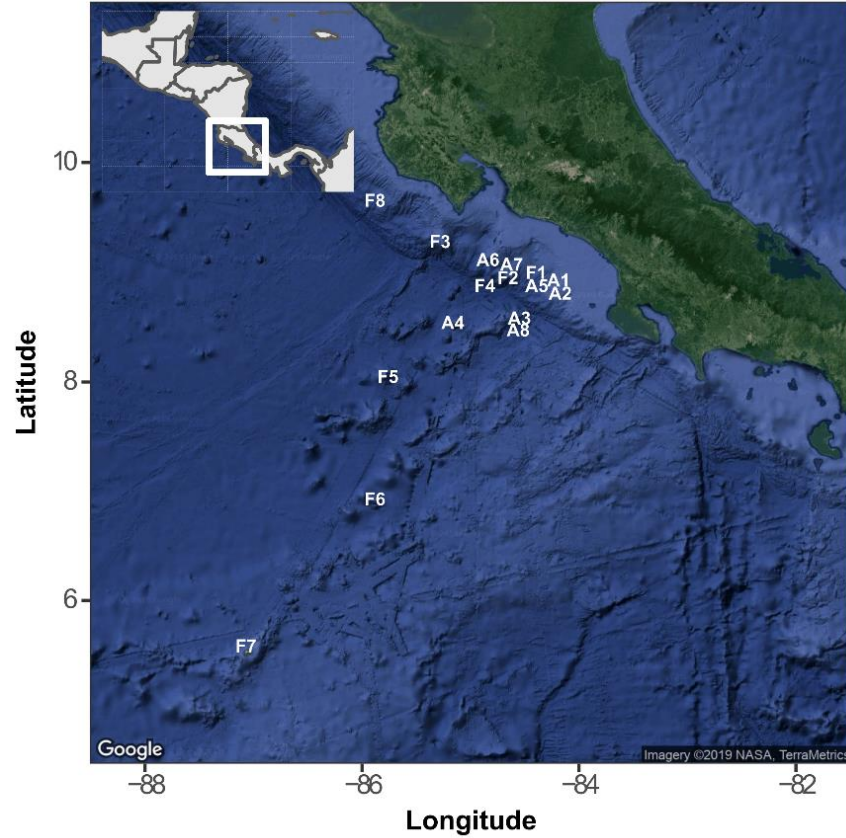

467

468 **Figure 1.** The geographical location of sampling points in the Eastern Tropical Pacific of Costa Rica. The  
469 points indicated with the letter **A** correspond to the route followed by the *Atlantis* cruise and those with the  
470 letter **F** to the *Falkor* cruise. The map was generated with the ggmap package using a Google satellite image.

471 **Figure 2**

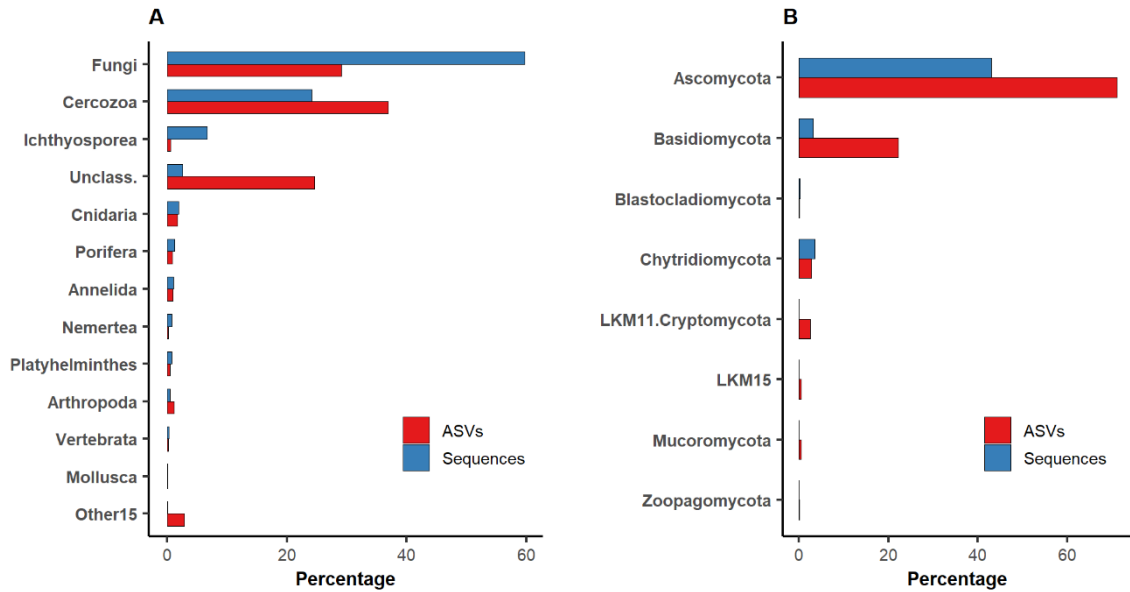

472

473 **Figure 2.** The relative abundance of eukaryotic groups (A) and fungal groups (B) in deep-sea sediments of  
474 the Eastern Tropical Pacific of Costa Rica concerning the number of sequences and amplicon sequence  
475 variants (ASVs).



476 **Figure 3**

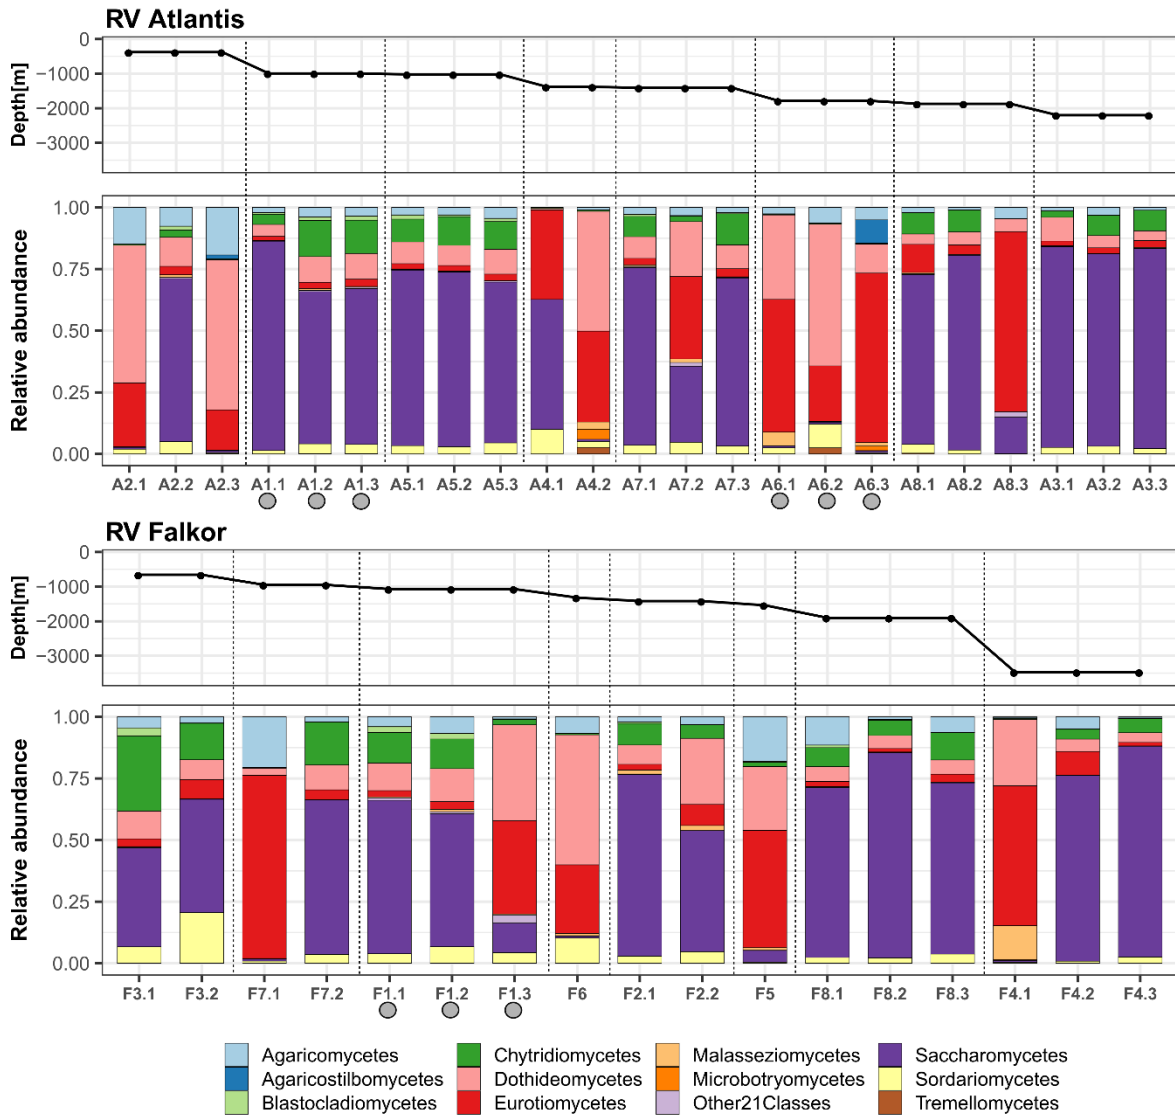

477

478 **Figure 3.** The relative abundance of fungi, at the taxonomic level of class, in deep-sea sediments of the  
 479 eastern tropical Pacific of Costa Rica. The proportions within sampling points of the core subsamples for  
 480 each of the cruise transects are shown. The samples were ordered according to the depth gradient. Gray  
 481 circles indicate active methane seeps.

482 **Figure 4**

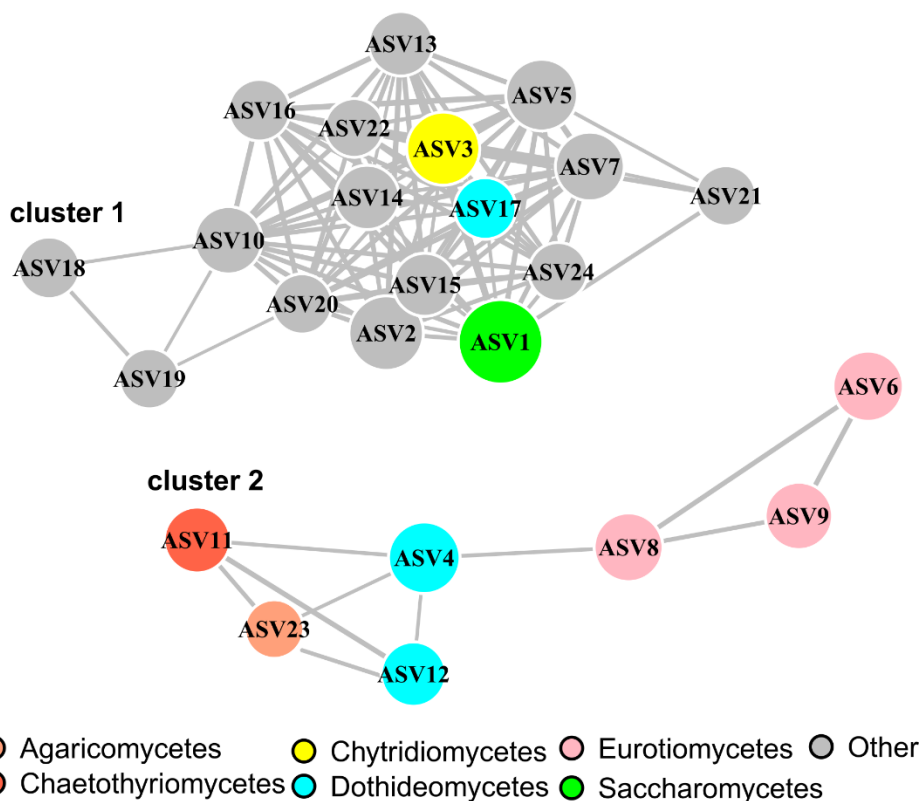

483

484 **Figure 4.** Network analysis highlighting the relationships between the groups of fungi and also with respect  
 485 to other groups of eukaryotes present in 40 samples from deep-sea sediments. The analysis is based on the  
 486 24 most abundant eukaryotic ASVs (10 classified as fungi), which corresponded to nearly 70% of the total  
 487 number of eukaryotic sequences. Colors of the nodes represent the taxonomic affiliation of the ASVs, while  
 488 the size of the circles is proportional to their log-abundance. The network was generated and visualized  
 489 with package igraph. The taxonomic classification of the ASVs at the genus level and kingdom level are  
 490 shown as follows: ASV1: *Metschnikowia*(Fungi), ASV2: *Gymnophrys*(Cercozoa), ASV3: *Rhizophydium*(Fungi),  
 491 ASV4: *Cladosporium*(Fungi), ASV5: *Pirum*(Ichthyosporea), ASV6: *Aspergillus*(Fungi), ASV7:  
 492 *Pirum*(Ichthyosporea), ASV8: *Aspergillus*(Fungi), ASV9: *Aspergillus*(Fungi), ASV10:  
 493 *Cryothecomonas*(Cercozoa), ASV11: *Exophiala*(Fungi), ASV12: *Neophaeosphaeria*(Fungi), ASV13:  
 494 *Gymnophrys*(Cercozoa), ASV14: *Polymastia*(Porifera), ASV15: *Gymnophrys*(Cercozoa), ASV16:  
 495 *Pirum*(Ichthyosporea), ASV17: *Acidomyces*(Fungi), ASV18: *Cossura*(Annelida), ASV19:  
 496 *Tetrastemma*(Nemertea), ASV20: *Cryothecomonas*(Cercozoa), ASV21: *Pelagia*(Cnidaria), ASV22:  
 497 *Cryothecomonas*(Cercozoa), ASV23: *Armillaria*(Fungi), ASV24: *Quadricilia*(Cercozoa).

498

## SUPPLEMENTARY MATERIAL

499

### **Fungal communities in sediments along a depth gradient in the Eastern Tropical Pacific**

500 Keilor Rojas-Jimenez<sup>1\*</sup>, Hans Peter Grossart<sup>2,3</sup>, Erik Cordes<sup>4</sup>, Jorge Cortés<sup>1,5</sup>

501 <sup>1</sup>Escuela de Biología, Universidad de Costa Rica, 11501 San José, Costa Rica.

502 <sup>2</sup>Department of Experimental Limnology, Leibniz-Institute of Freshwater Ecology and Inland Fisheries, Alte  
503 Fischerhuetten 2, D-16775 Stechlin, Germany.

504 <sup>3</sup>Institute for Biochemistry and Biology, Potsdam University, Maulbeerallee 2, 14469 Potsdam, Germany.

505 <sup>4</sup>Department of Biology, Temple University, Philadelphia, Pennsylvania, USA.

506 <sup>5</sup>Centro de Investigación en Ciencias del Mar y Limnología (CIMAR), Universidad de Costa Rica, San Pedro,  
507 11501 San José, Costa Rica.

508

509 \*Corresponding author

510 Keilor Rojas-Jimenez, [keilor.rojas@gmail.com](mailto:keilor.rojas@gmail.com)

511 **Supplementary Table 1.** Statistical analysis of the fungal community composition related to  
512 different variables. The PERMANOVA tests were performed using function adonis2 and  
513 implemented in Vegan package. Data were normalized by converting the ASV counts into relative  
514 abundances. Binning of continuous variables Depth, Temperature, Dissolved Oxygen and pH was  
515 performed with package Hmisc.

516

| Variable         | Comparison                   | R2      | F.Model | p.value |
|------------------|------------------------------|---------|---------|---------|
| Expedition       | Atlantlis vrs Falkor         | 0.02092 | 0.8119  | 0.4555  |
| Feature          | Seep vrs no-seep             | 0.05148 | 1.0041  | 0.3506  |
| Salinity         | All (16 locations)           | 0.01851 | 0.7165  | 0.5275  |
| Depth            | All (16 locations)           | 0.02929 | 1.1467  | 0.2697  |
|                  | 380-1419 m vrs 1419-3474m    | 0.02233 | 0.8678  | 0.4046  |
| Temperature      | All (16 locations)           | 0.02843 | 1.1121  | 0.2947  |
|                  | 1.88-3.5 vrs 3.50-14.4       | 0.02003 | 0.7765  | 0.4585  |
| Dissolved Oxygen | All (16 locations)           | 0.03454 | 1.3597  | 0.2118  |
|                  | 0.20-2.21 vrs 2.21-4.20 mg/L | 0.02428 | 0.9456  | 0.3686  |
| pH               | All (16 locations)           | 0.03003 | 1.1765  | 0.2607  |
|                  | 7.60-7.71 vrs 7.71-8.12      | 0.02863 | 1.12    | 0.2697  |

517

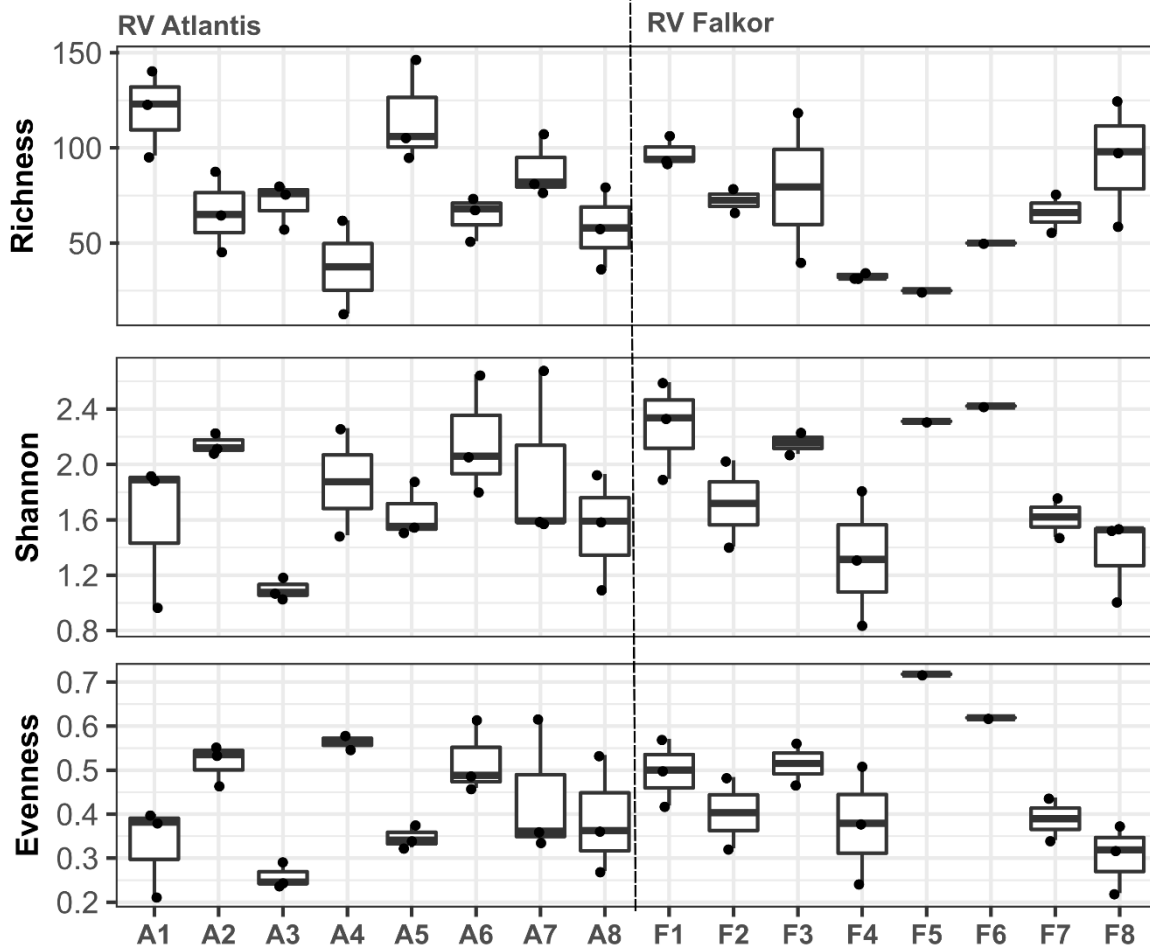

518

519 **Supplementary Figure 1.** Boxplots of the alpha diversity estimations of the sampling points in  
520 deep-sea sediments of the Eastern Tropical Pacific.

521

522

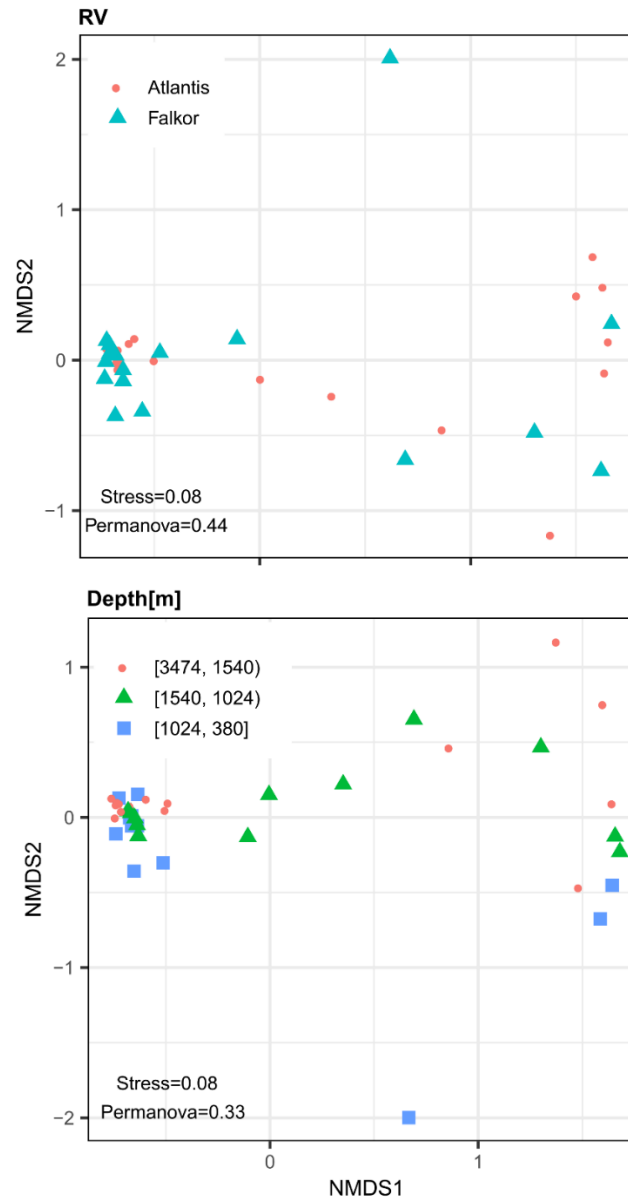

523

524 **Supplementary Figure 2.** Non-metric multidimensional scaling (NMDS) analyses of the fungal  
525 communities in deep-sea sediments. The analysis include 40 samples from sediments obtained in a  
526 bathymetric gradient (from a depth of 380 to 3474 m) along two transects of about 1500 km  
527 length in the Eastern Tropical Pacific of Costa Rica. The upper panel shows the analysis by transect  
528 and the lower the analysis by depth. The stress values of the NMDS and the p value of the  
529 permanova analyses are also shown.
